# Supplementary material for: Biological Screening and Crystallographic Studies of Hydroxy γ-Lactone Derivatives to Investigate PPARγ Phosphorylation Inhibition
Source: MDPI journal article supplement (doi:10.3390/biom13040694), 2023-04-19
Supplement: s1 [file s1]

**Table S1.** Summary of crystallographic analysis for crystals of PPAR $\gamma$ -LBD in complex with **1** and **3**. Values in parentheses refer to the highest resolution shell.

|                                                   | PPAR $\gamma$ -LBD/ <b>1</b> | PPAR $\gamma$ -LBD/ <b>3</b> |
|---------------------------------------------------|------------------------------|------------------------------|
| <b>Data collection</b>                            |                              |                              |
| space group                                       | <i>C2</i>                    | <i>C2</i>                    |
| cell dimension <i>a</i> , <i>b</i> , <i>c</i> [Å] | 92.87, 59.95, 117.37         | 93.12, 61.32, 118.77         |
| wavelength [Å]                                    | 0.9677                       | 0.9677                       |
| resolution range [Å]                              | 57.15 - 2.13                 | 40.81 - 2.20                 |
| last shell [Å]                                    | 2.19 - 2.13                  | 2.26 - 2.20                  |
| <i>R</i> <sub>merge</sub> [%]                     | 0.051 (1.317)                | 0.052 (1.279)                |
| unique reflections                                | 33410                        | 40546                        |
| mean ( <i>I</i> )/ $\sigma$ ( <i>I</i> )          | 11.2 (0.6)                   | 14.5 (0.5)                   |
| completeness                                      | 94.5 (83.2)                  | 95.6 (85.1)                  |
| No. of molecules in asymmetric unit               | 2                            | 2                            |
| <b>Refinement</b>                                 |                              |                              |
| resolution range [Å]                              | 57.15 - 2.13                 | 40.81 - 2.20                 |
| <i>R</i> <sub>work</sub> [%]                      | 21.6                         | 22.4                         |
| <i>R</i> <sub>free</sub> [%]                      | 25.6                         | 27.1                         |
| Bond lengths r.m.s.d. [Å]                         | 0.007                        | 0.012                        |
| Bond angles r.m.s.d. [deg]                        | 0.997                        | 1.293                        |
| <b>PDB ID</b>                                     | 8ADF                         | 8C0C                         |

## Chemistry—Experimental data

2-Acetamidoacetic acid (**4**).

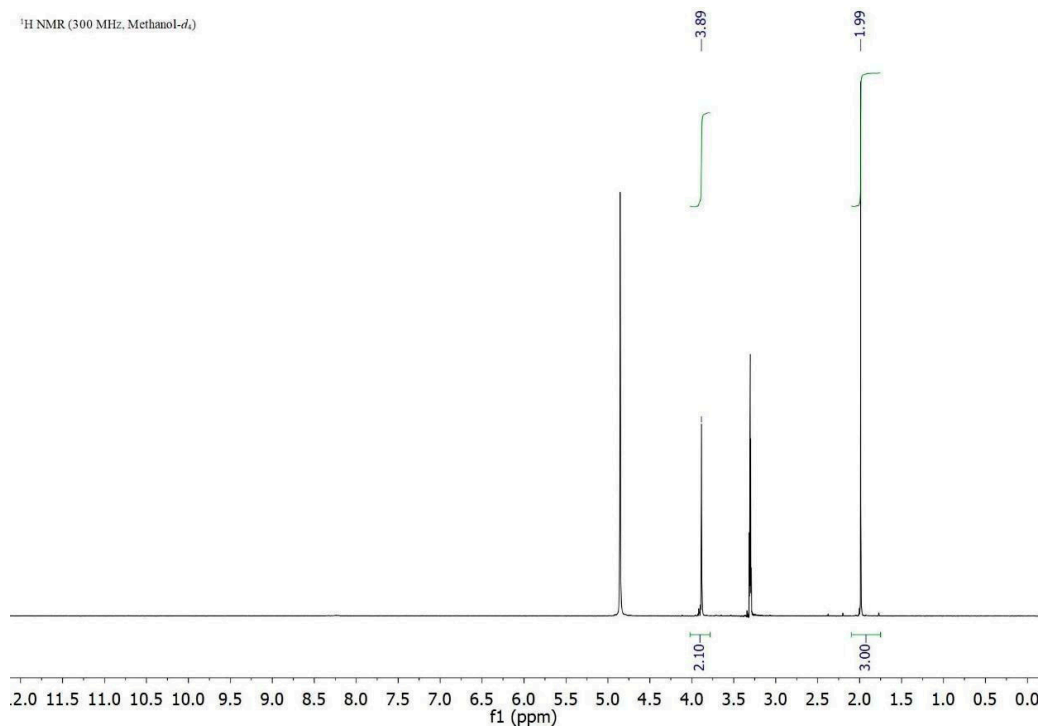

Figure S1. <sup>1</sup>H NMR spectrum of **4**.

(*Z*)-4-(4-Bromobenzylidene)-2-methyloxazol-5(4*H*)-one (**5**).

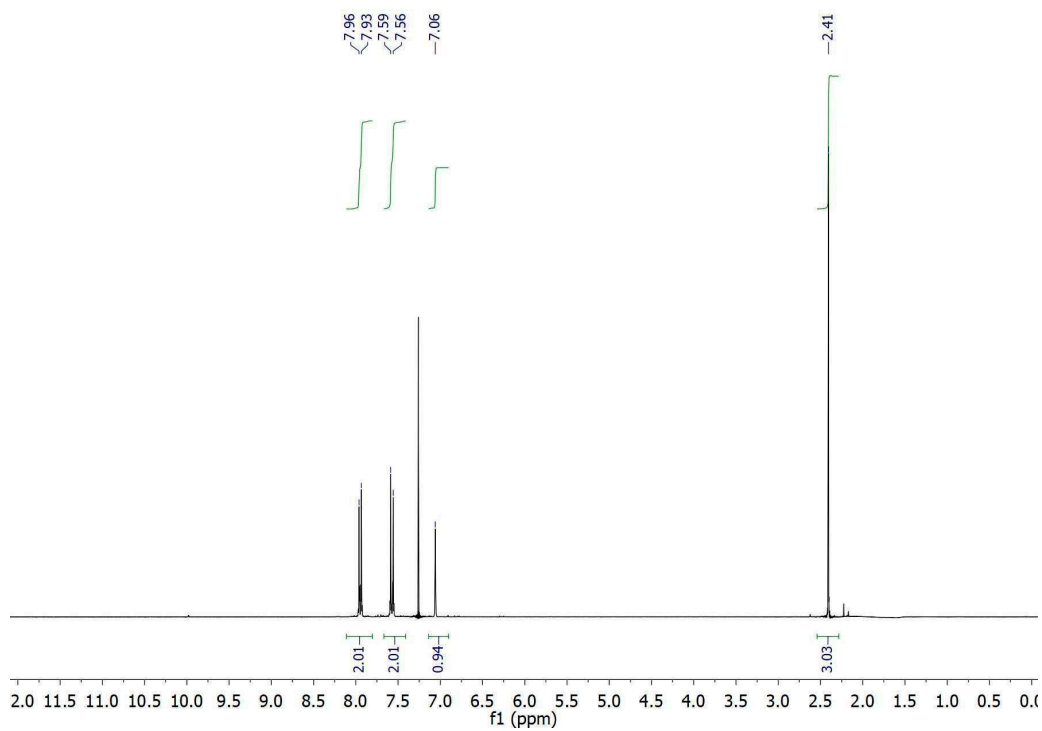

Figure S2. <sup>1</sup>H NMR spectrum of **5**.

2-Acetamido-3-(4-bromophenyl)propanoic acid (**6**).

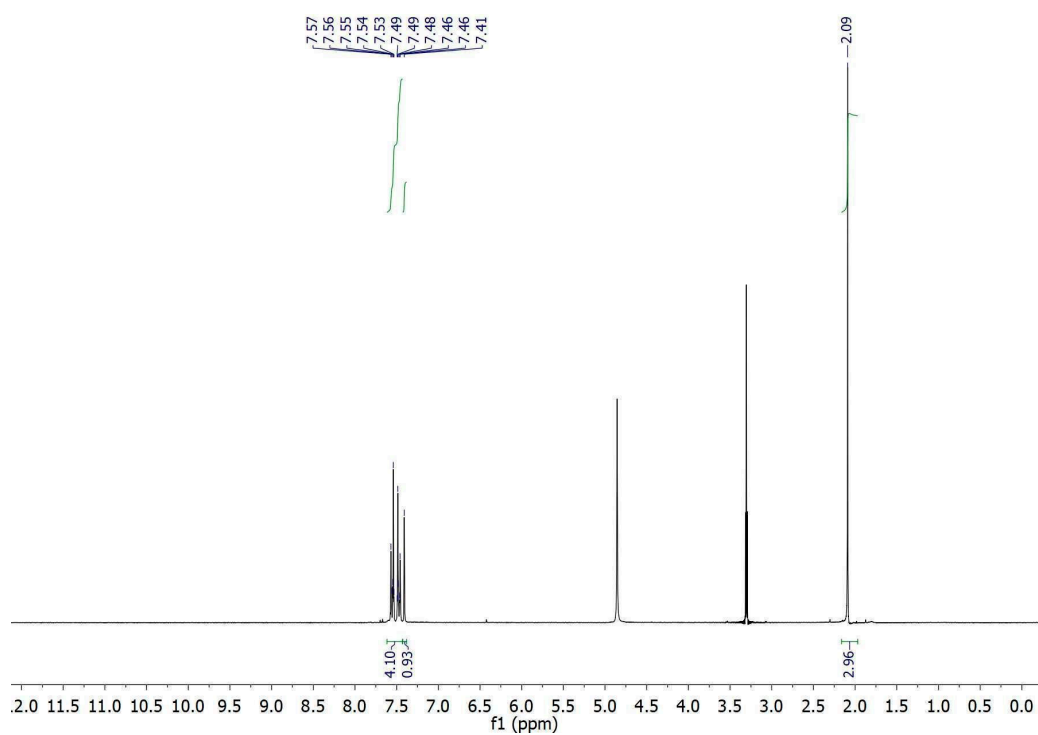

**Figure S3.** <sup>1</sup>H NMR spectrum of **6**.

4-(4-Bromophenyl)-3-hydroxy-5-(3-hydroxyphenyl)furan-2(5H)-one (**1**).

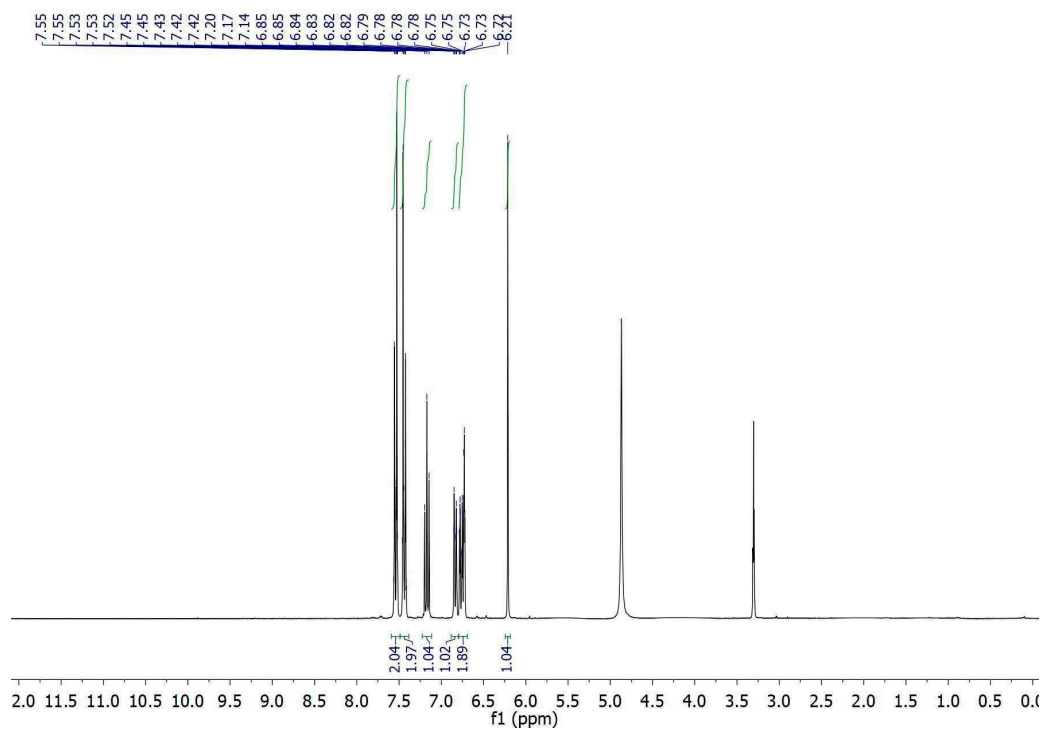

**Figure S4.** <sup>1</sup>H NMR spectrum of **1**.

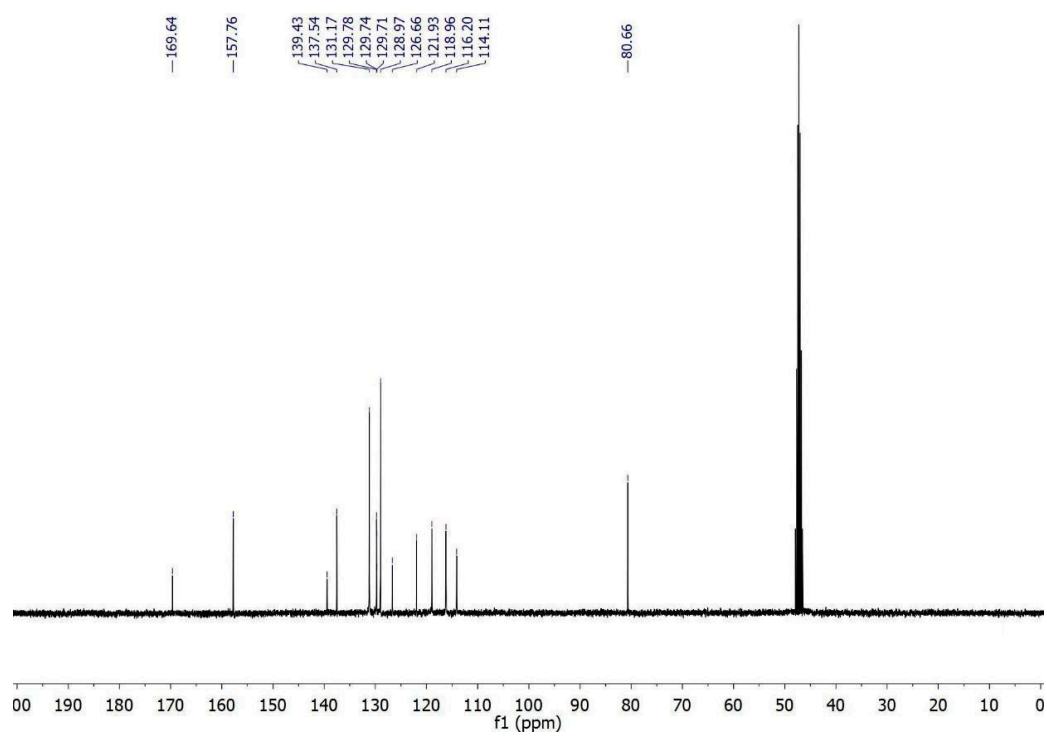

**Figure S5.** <sup>13</sup>C NMR spectrum of 1.

### Single Mass Analysis

Tolerance = 5.0 PPM / DBE: min = -5.0, max = 300.0

Element prediction: Off

Number of isotope peaks used for i-FIT = 5

Monoisotopic Mass, Even Electron Ions

15 formula(e) evaluated with 1 results within limits (all results (up to 1000) for each mass)

Elements Used:

C: 16-16 H: 10-11 O: 4-4 Na: 0-4 K: 0-2 Br: 1-1

CZ39 2 (0.070) AM2 (Ar,40000.0,0.00,0.00); Cm (1:50)

1: TOF MS ES-  
6.41e+006

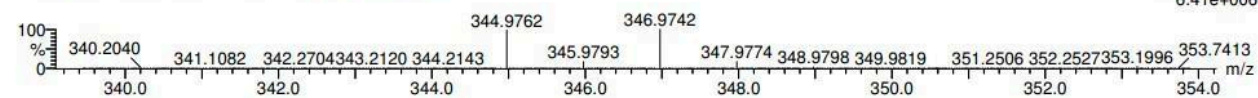

Minimum: -5.0  
Maximum: 300.0

| Mass     | Calc. Mass | mDa | PPM | DBE  | i-FIT  | Norm | Conf(%) | Formula       |
|----------|------------|-----|-----|------|--------|------|---------|---------------|
| 344.9762 | 344.9762   | 0.0 | 0.0 | 11.5 | 2820.7 | n/a  | n/a     | C16 H10 O4 Br |

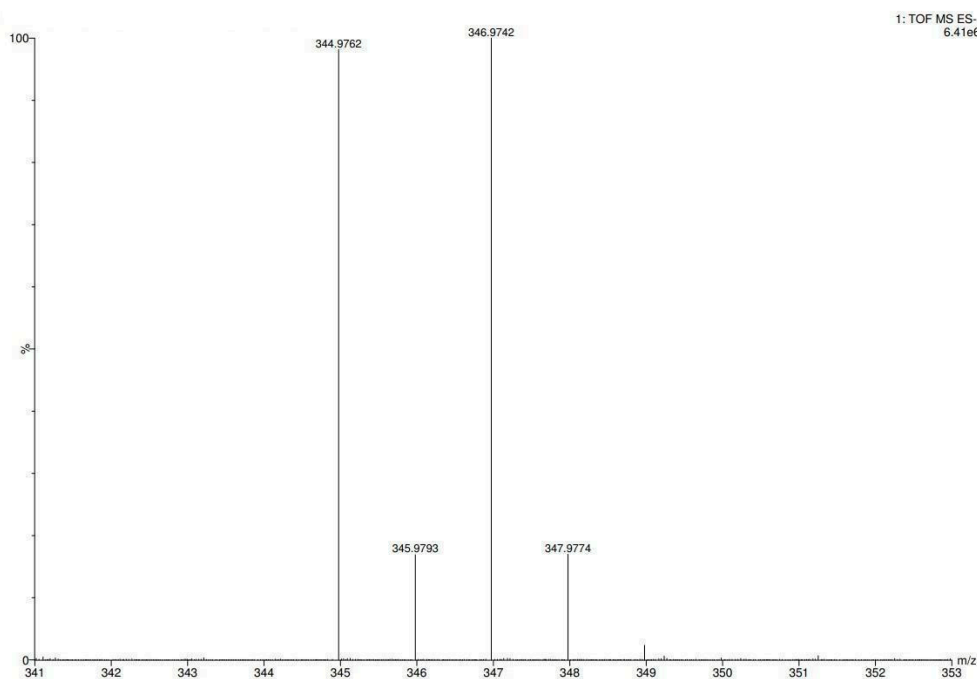

Figure S6. MS spectrum of 1.

4-Benzoyl-3-hydroxy-5-(3-hydroxyphenyl)furan-2(5H)-one (2).

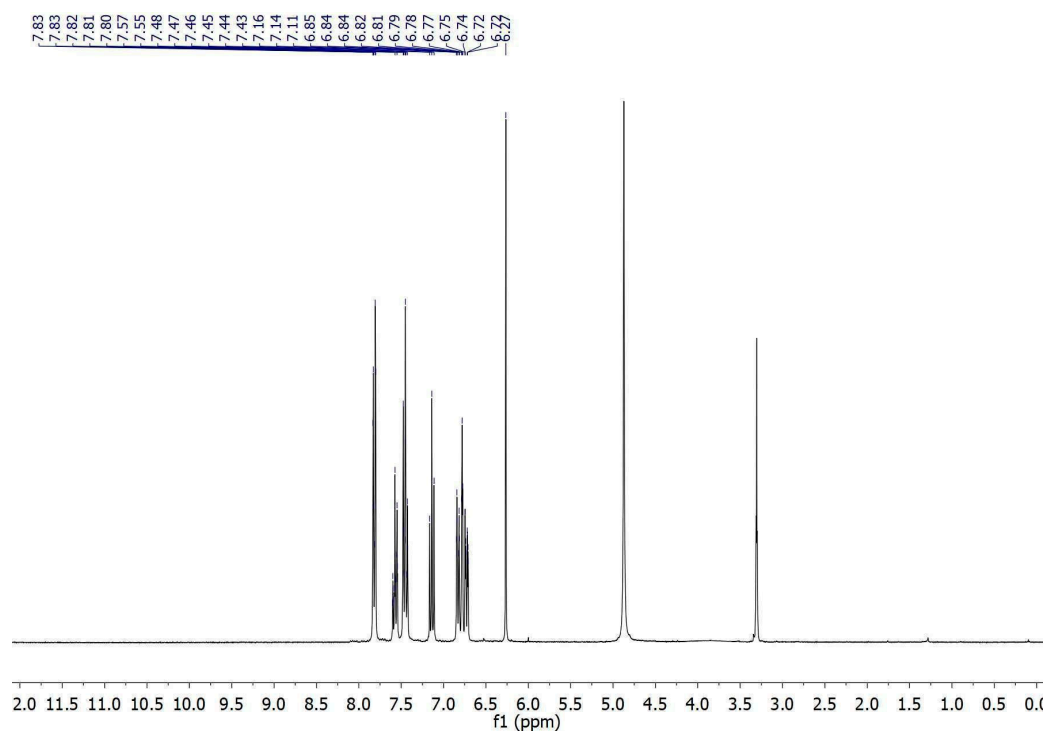

Figure S7. <sup>1</sup>H NMR spectrum of 2.

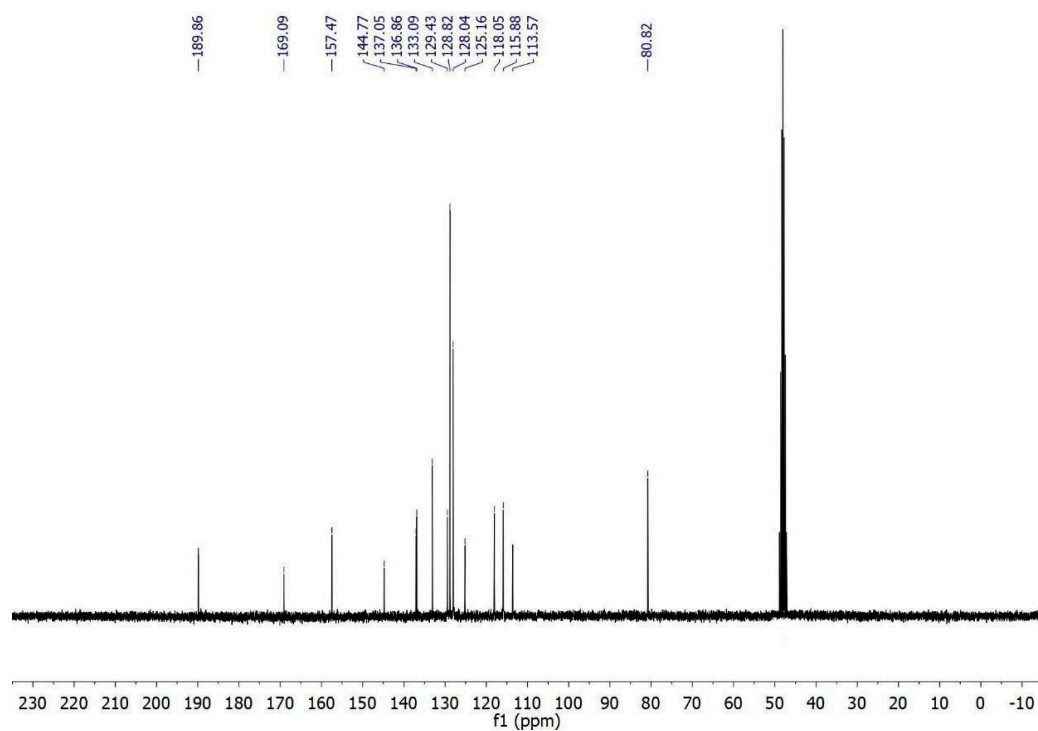

Figure S8. <sup>13</sup>C NMR spectrum of 2.

### Single Mass Analysis

Tolerance = 5.0 PPM / DBE: min = -5.0, max = 300.0

Element prediction: Off

Number of isotope peaks used for i-FIT = 5

Monoisotopic Mass, Even Electron Ions

15 formula(e) evaluated with 1 results within limits (all results (up to 1000) for each mass)

Elements Used:

C: 17-17 H: 11-12 O: 5-5 Na: 0-4 K: 0-2

CZ16B 9 (0.208) AM2 (Ar,40000.0,0.00,0.00); Cm (1:50)

1: TOF MS ES-  
2.17e+007

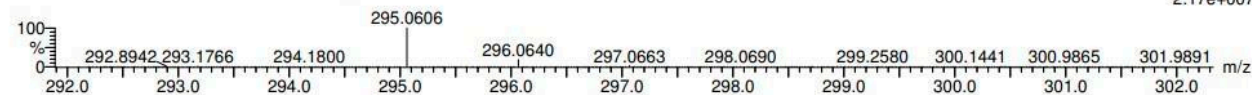

Minimum: -5.0  
Maximum: 5.0 5.0 300.0

| Mass     | Calc. Mass | mDa | PPM | DBE  | i-FIT  | Norm | Conf (%) | Formula    |
|----------|------------|-----|-----|------|--------|------|----------|------------|
| 295.0606 | 295.0606   | 0.0 | 0.0 | 12.5 | 2960.8 | n/a  | n/a      | C17 H11 O5 |

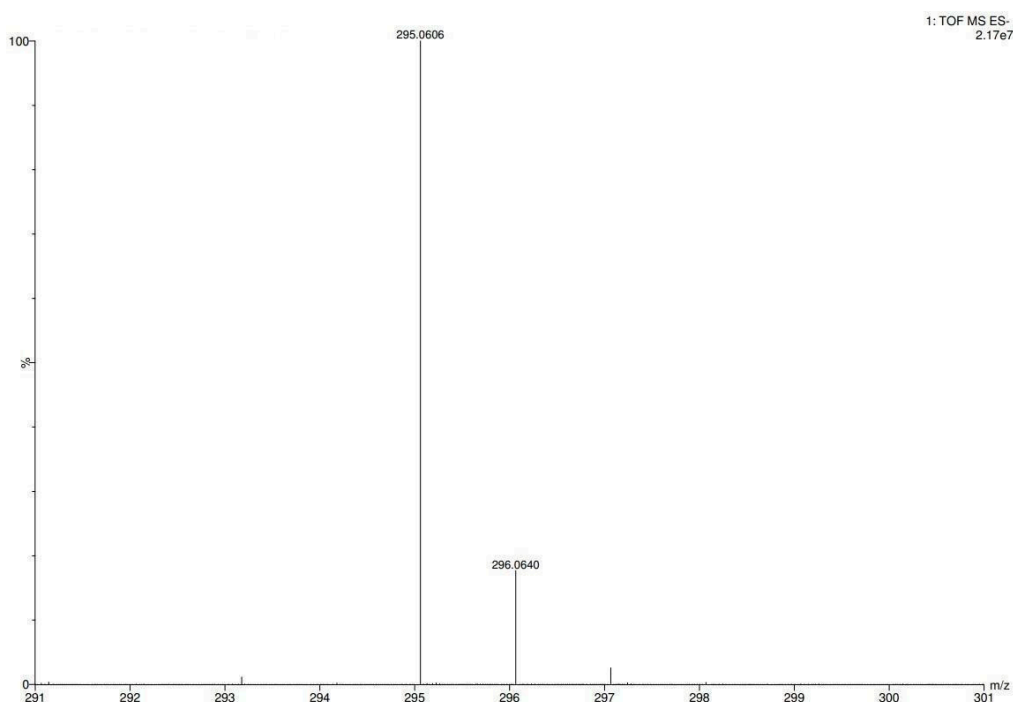

1: TOF MS ES-  
2.17e7

Figure S9. MS spectrum of 2.

(Z)-methyl 2-hydroxy-3-phenylacrylate (**9**).

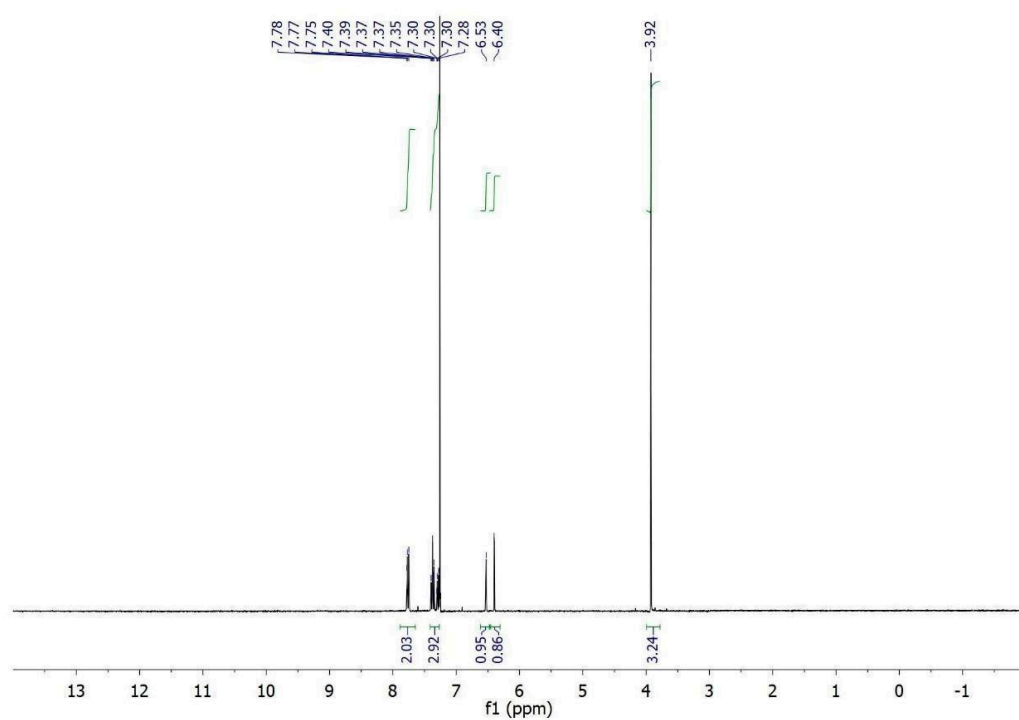

**Figure S10.** <sup>1</sup>H NMR spectrum of **9**.

4-(naphthalen-1-ylmethoxy)benzaldehyde (**10**).

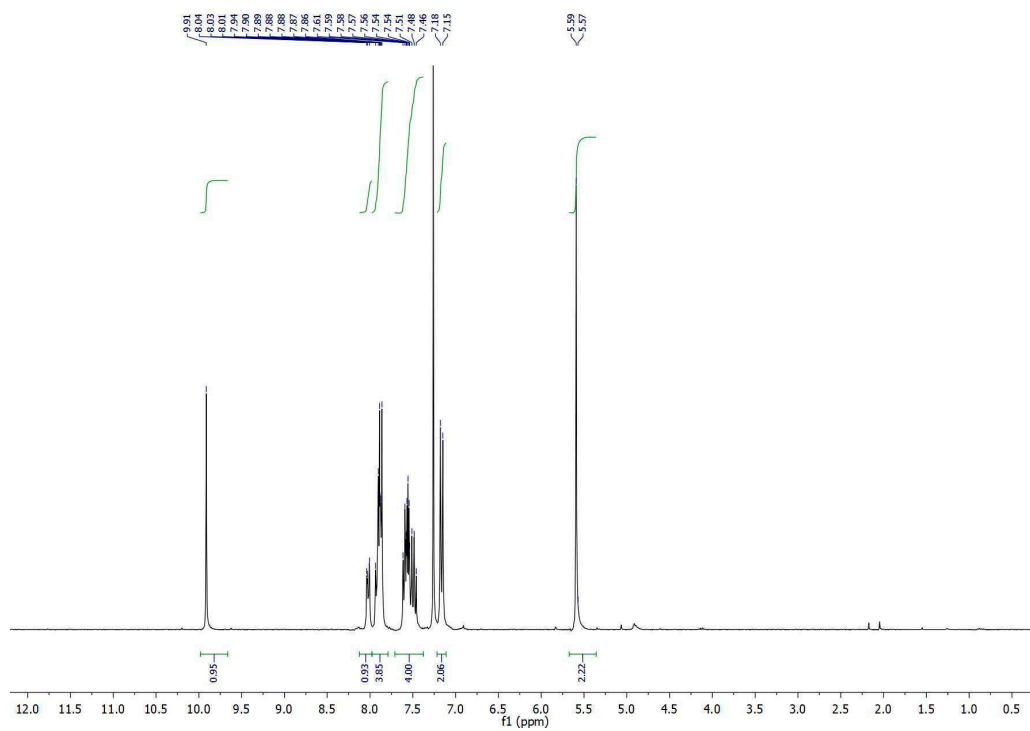

**Figure S11.** <sup>1</sup>H NMR spectrum of **10**.



3-hydroxy-5-(4-(naphthalen-1-ylmethoxy)phenyl)-4-phenylfuran-2(5H)-one (3).

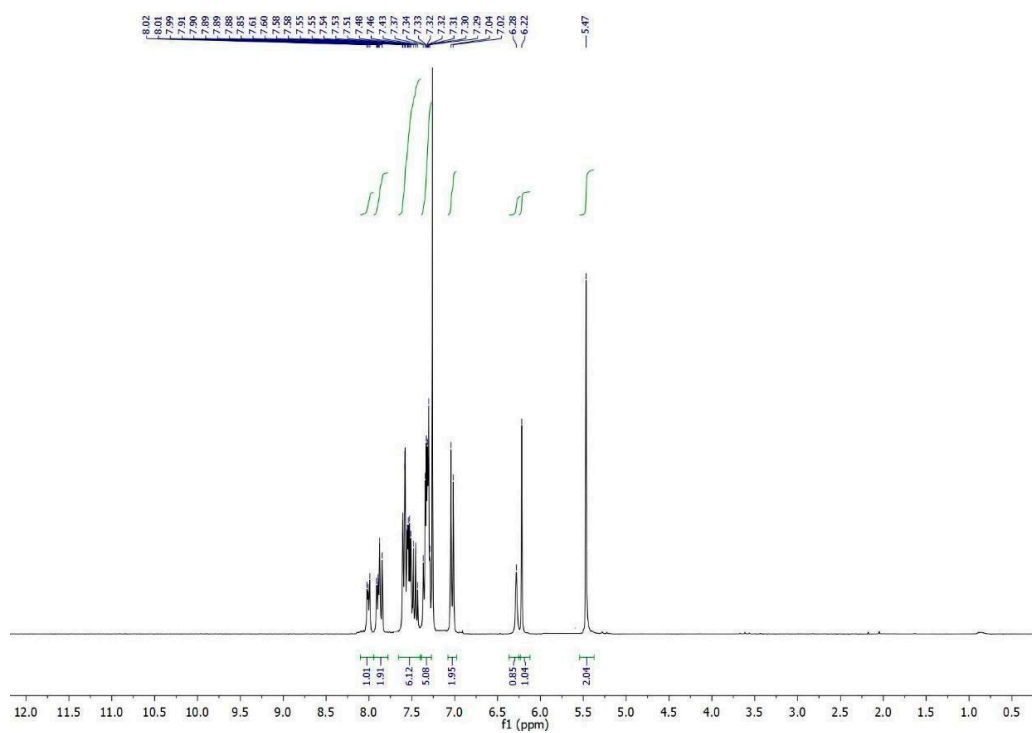

Figure S12. <sup>1</sup>H NMR spectrum of 3.

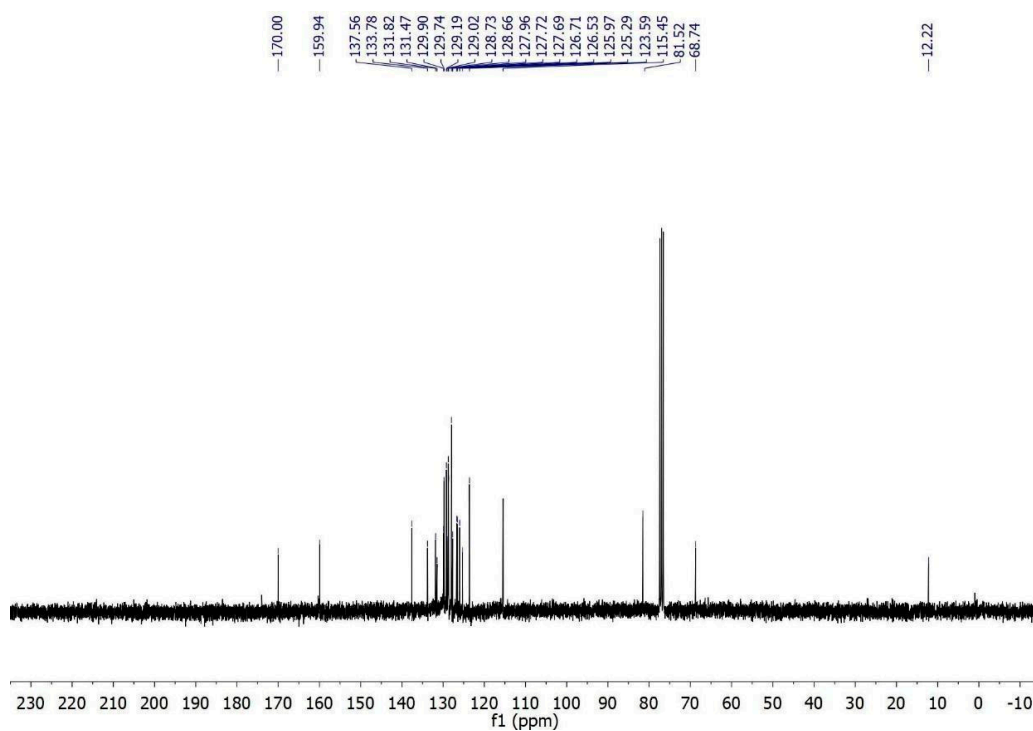

Figure S13. <sup>13</sup>C NMR spectrum of 3.

### Single Mass Analysis

Tolerance = 5.0 PPM / DBE: min = -5.0, max = 300.0

Element prediction: Off

Number of isotope peaks used for i-FIT = 5

Monoisotopic Mass, Even Electron Ions

14 formula(e) evaluated with 1 results within limits (all results (up to 1000) for each mass)

Elements Used:

C: 27-27 H: 19-20 O: 4-4 Na: 0-4 K: 0-2

CZ46 2 (0.070) AM2 (Ar,40000.0,0.00,0.00); Cm (1:50)

1: TOF MS ES-  
1.27e+007

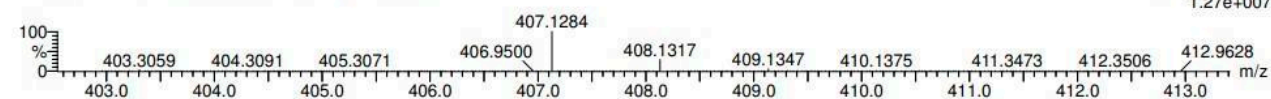

Minimum: -5.0  
Maximum: 5.0 5.0 300.0

| Mass     | Calc. Mass | mDa | PPM | DBE  | i-FIT  | Norm | Conf (%) | Formula    |
|----------|------------|-----|-----|------|--------|------|----------|------------|
| 407.1284 | 407.1283   | 0.1 | 0.2 | 18.5 | 2291.5 | n/a  | n/a      | C27 H19 O4 |

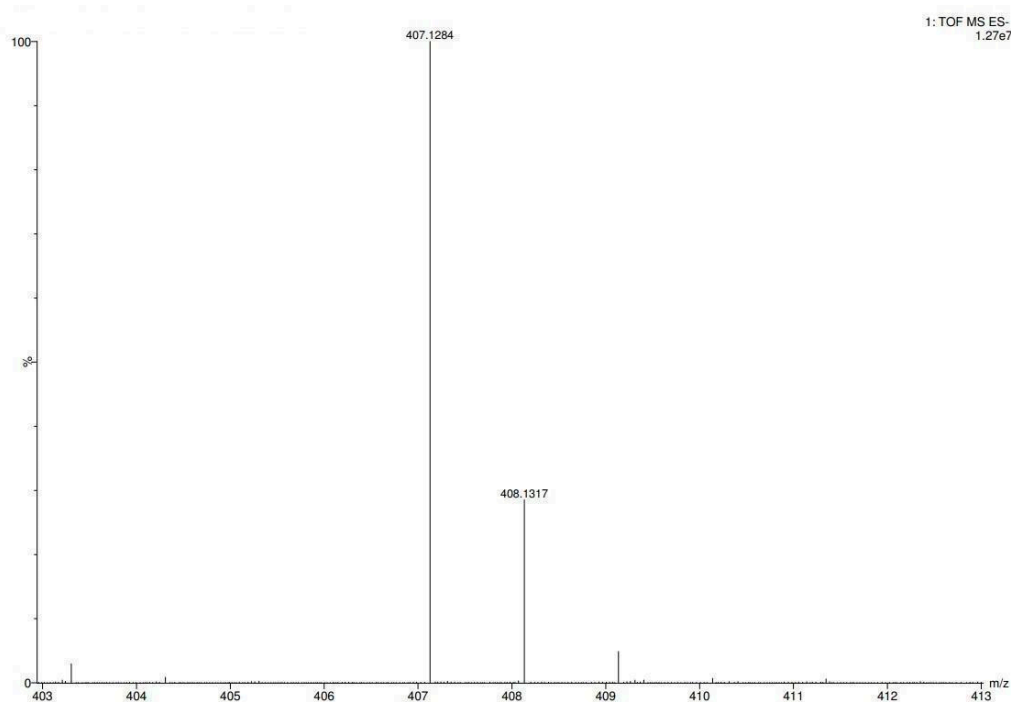

1: TOF MS ES-  
1.27e7

Figure S14. MS spectrum of 3.

**Table S2.** OneStep assay (duplicate) performed on the compounds—single gradient injection up to 10  $\mu\text{M}$  Flux 50  $\mu\text{l/min}$ . Dissociation 600''. No regeneration. LT175 as the positive control.

| Ligand               | $K_D(\mu\text{M})$ | Structure                                                                           | Sensorgram (OneStep®)                                                                 |
|----------------------|--------------------|-------------------------------------------------------------------------------------|---------------------------------------------------------------------------------------|
| LT175 ( <i>ref</i> ) | $2.55 \pm 0.02$    | 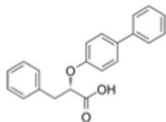   |    |
| CZ39 ( <b>1</b> )    | $2.23 \pm 0.04$    |    |    |
| CZ16B ( <b>2</b> )   | $1.46 \pm 0.01$    |    |    |
| CZ46 ( <b>3</b> )    | $3.58 \pm 0.01$    |   |   |
| CZ30                 | uncertain          |  |  |
| CZ41                 | no binding         |  |  |
| CZ43                 | $>10 \mu\text{M}$  |  |  |
| CZ48                 | $>10 \mu\text{M}$  |  |  |
| CZ49                 | uncertain          |  |  |

|       |             |                                                                                     |                                                                                       |
|-------|-------------|-------------------------------------------------------------------------------------|---------------------------------------------------------------------------------------|
| CZ52  | >10 $\mu$ M | 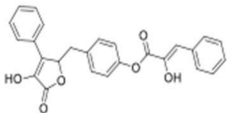   |    |
| MQ1   | >10 $\mu$ M |    |    |
| MQ5   | no binding  |    |    |
| TT1   | >10 $\mu$ M |    |    |
| CZ11B | no binding  |  |  |
| CZ13  | no binding  |  |  |
| CZ18  | no binding  |  |  |
| CZ19A | uncertain   |  |  |
| CZ19  | >10 $\mu$ M |  |  |

|      |             |                                                                                     |                                                                                       |
|------|-------------|-------------------------------------------------------------------------------------|---------------------------------------------------------------------------------------|
| CZ21 | >10 $\mu$ M | 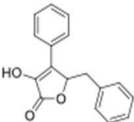   |    |
| CZ22 | >10 $\mu$ M |    |    |
| CZ27 | uncertain   |    |    |
| CZ28 | >10 $\mu$ M |    |    |
| CZ29 | uncertain   |  |  |
| CZ31 | no binding  |  |  |
| CZ32 | uncertain   |  |  |
| CZ35 | uncertain   |  |  |
| CZ36 | uncertain   |  |  |

|      |             |                                                                                   |                                                                                     |
|------|-------------|-----------------------------------------------------------------------------------|-------------------------------------------------------------------------------------|
| CZ37 | uncertain   | 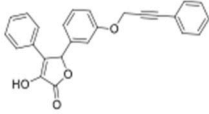 |  |
| CZ38 | no binding  |  |  |
| CZ47 | >10 $\mu$ M |  |  |
